# Supplementary material for: Superconducting properties in doped 2M-WS2 from first principles
Source: Royal Society of Chemistry journal article supplement (doi:10.1039/d2tc01173e), 2022-01-01
Supplement: d2tc01173e1.pdf [file d2tc01173e1.pdf]

## Supplemental Material

### Superconducting properties in doped 2M-WS<sub>2</sub> from first principles

Hari Paudyal<sup>1</sup> and Elena R. Margine<sup>1</sup>

<sup>1</sup>*Department of Physics, Applied Physics, and Astronomy,  
 Binghamton University-SUNY, Binghamton, New York 13902, USA*  
 (Dated: April 23, 2022)

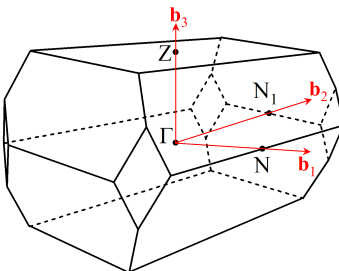

FIG. S1. Brillouin zone of 2M-WS<sub>2</sub> with high symmetry points.

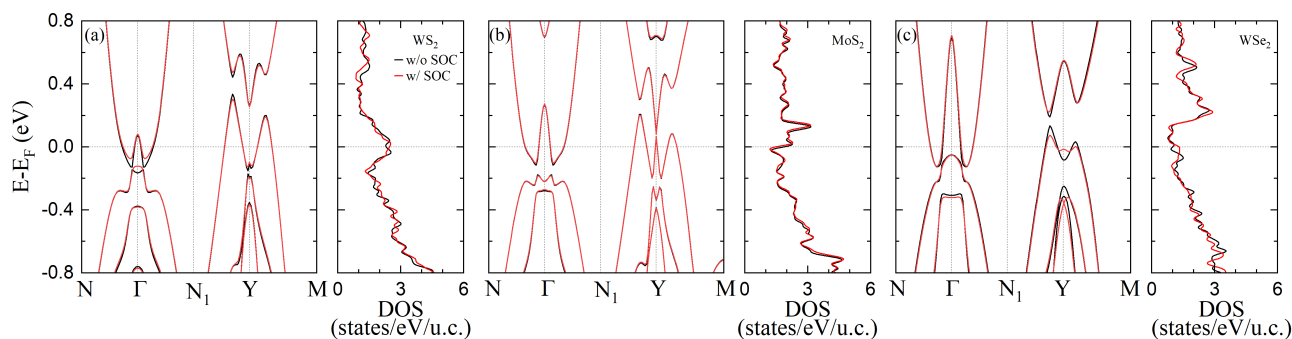

FIG. S2. Calculated electronic band structure and DOS of (a) WS<sub>2</sub>, (b) MoS<sub>2</sub>, and (c) WSe<sub>2</sub> for the 2M phase with and without using spin orbit coupling (SOC). An opening of the bands can be observed in the WS<sub>2</sub> due to the effect of SOC at  $\Gamma$  around 0.1 eV below the Fermi level.

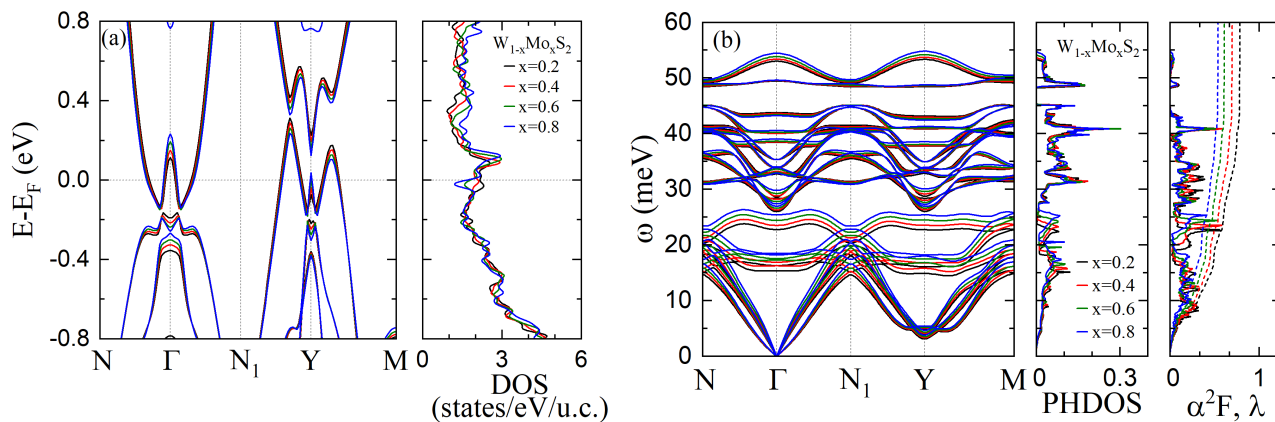

FIG. S3. (a) Calculated electronic band structure and DOS and (b) phonon dispersion, PHDOS, Eliashberg spectral function  $\alpha^2F(\omega)$ , and electron-phonon coupling strength  $\lambda$  of 2M-W<sub>1-x</sub>Mo<sub>x</sub>S<sub>2</sub> for various doping levels.

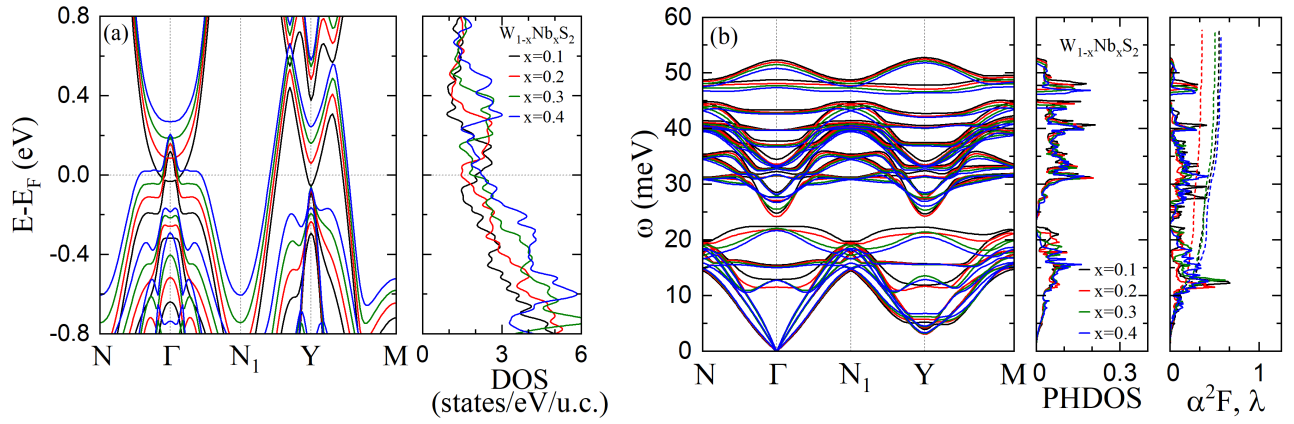

FIG. S4. (a) Calculated electronic band structure and DOS and (b) phonon dispersion, PHDOS, Eliashberg spectral function  $\alpha^2F(\omega)$ , and electron-phonon coupling strength  $\lambda$  of  $2M-W_{1-x}Nb_xS_2$  for various doping levels.

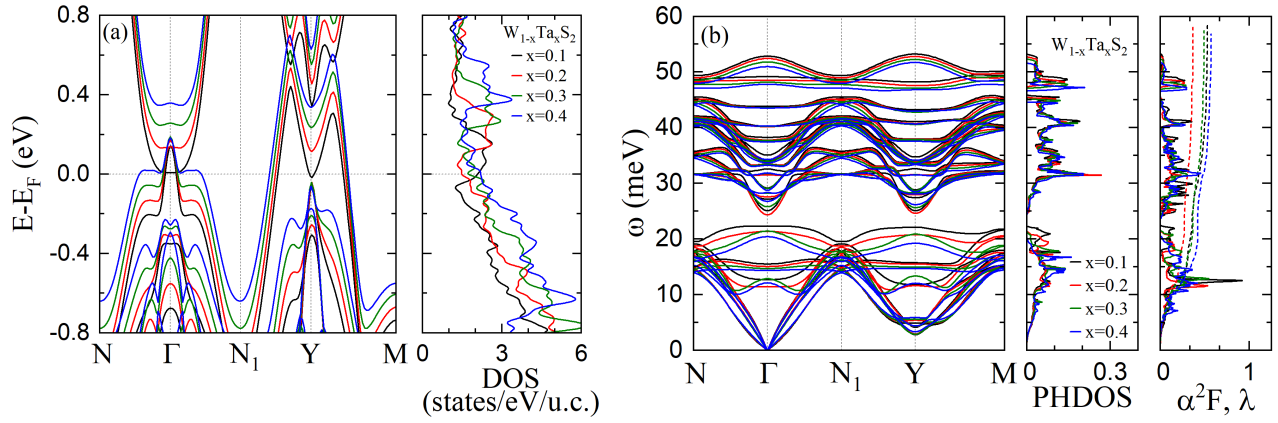

FIG. S5. (a) Calculated electronic band structure and DOS (states/eV/u.c.), (b) phonon dispersion, PHDOS, Eliashberg spectral function  $\alpha^2F(\omega)$ , and electron-phonon coupling strength  $\lambda$  of  $2M-W_{1-x}Ta_xS_2$  for various doping levels.

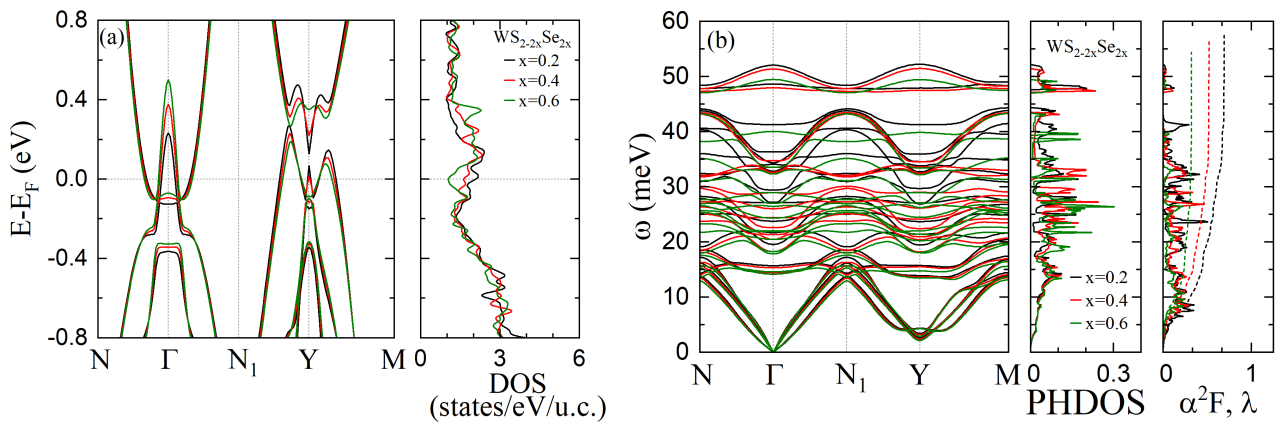

FIG. S6. (a) Calculated electronic band structure and DOS and (b) phonon dispersion, PHDOS, Eliashberg spectral function  $\alpha^2F(\omega)$ , and electron-phonon coupling strength  $\lambda$  of  $2M-WS_{2(1-x)}Se_{2x}$  for various doping levels.

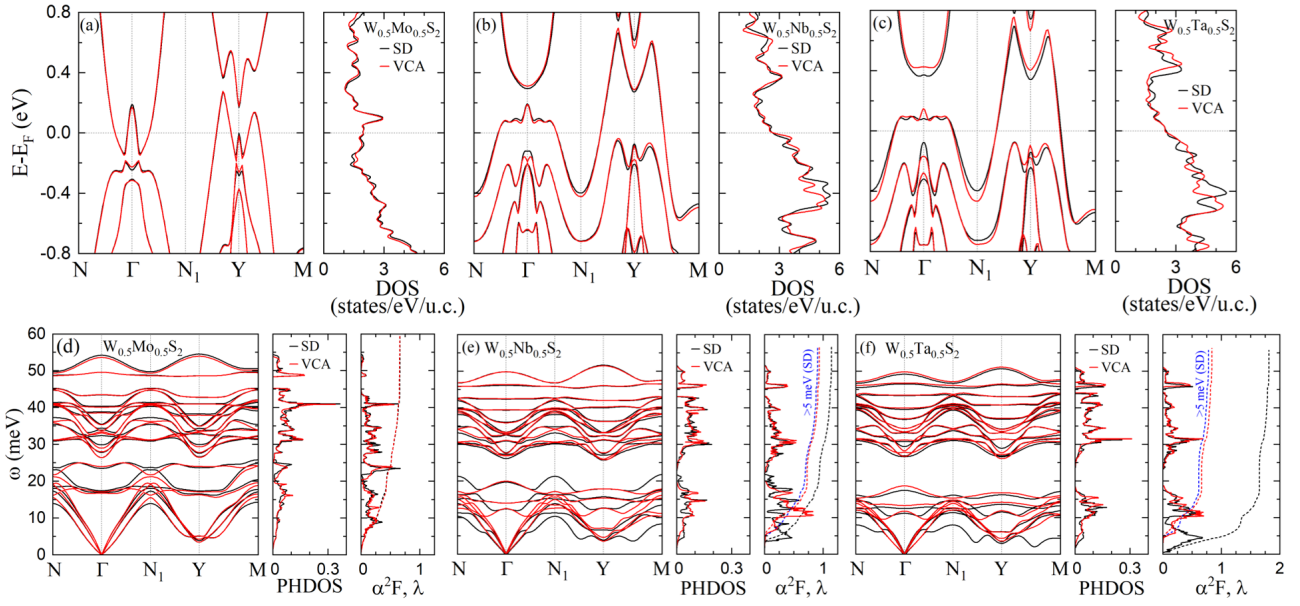

FIG. S7. (a-c) Electronic band structure and DOS and (d-f) phonon dispersion, PHDOS, Eliashberg spectral function  $\alpha^2F(\omega)$ , and electron-phonon coupling strength  $\lambda$  of 2M- $W_{0.5}M_{0.5}S_2$  (M = Mo, Nb, and Ta) calculated using the substitutional doping (SD) (black) and VCA (red) methods.

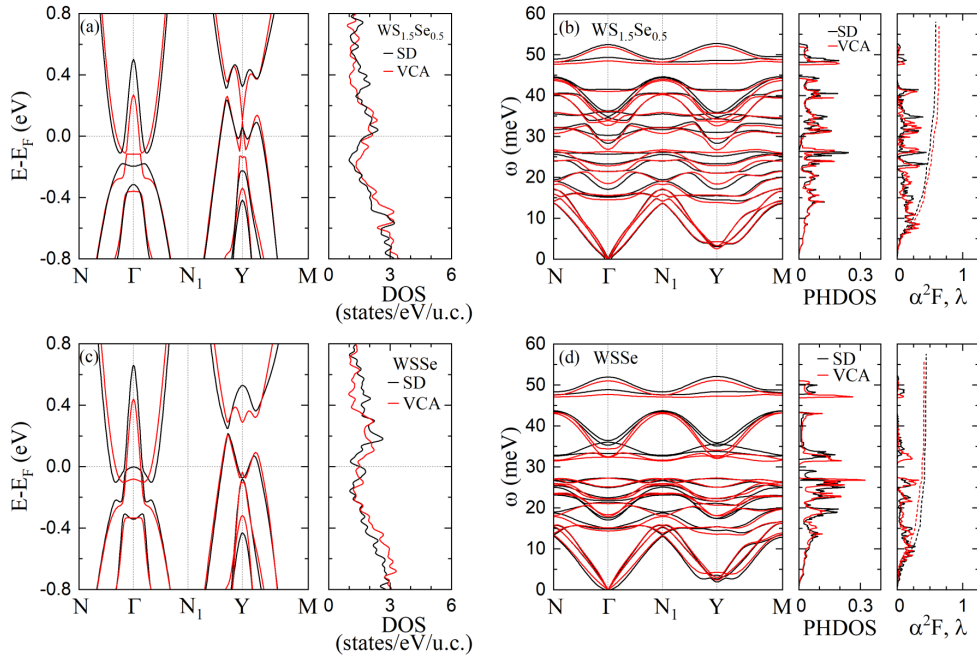

FIG. S8. (a, c) Electronic band structure and DOS and (b, d) phonon dispersion, PHDOS, Eliashberg spectral function  $\alpha^2F(\omega)$ , and electron-phonon coupling strength  $\lambda$  of 2M- $WS_{1.5}Se_{0.5}$  (top row) and 2M-WSSe (bottom row) calculated using the substitutional doping (SD) (black) and VCA (red) methods.
